# Supplementary material for: Clinical Characterization of the Three Waves of COVID-19 Occurring in Southern Italy: Results of a Multicenter Cohort Study
Source: MDPI journal article supplement (doi:10.3390/ijerph192316003), 2022-11-30
Supplement: s1 [file s1]

## Supplementary Data

**Table S1.** Demographic, Clinical and Laboratory data of patients with non-severe outcome grouped by period of hospitalization.

|                                                                    | <b>Non-severe<br/>COVID 19<br/>First wave</b> | <b>Non-severe<br/>COVID 19<br/>Second wave</b> | <b>Non-severe<br/>COVID 19<br/>Third wave</b> | <b>P value</b>      |
|--------------------------------------------------------------------|-----------------------------------------------|------------------------------------------------|-----------------------------------------------|---------------------|
| <b>N° of subjects</b>                                              | <b>287</b>                                    | <b>599</b>                                     | <b>503</b>                                    |                     |
| <b>N° (%) of males</b>                                             | 175(61)                                       | 362(60,4)                                      | 311(61.3)                                     | 0.953 <sup>a</sup>  |
| <b>Age, years, median (Q1-Q3)</b>                                  | 57(45-66)                                     | 62(49-72)                                      | 60(51-71)                                     | 0.0001 <sup>b</sup> |
| <b>Days of enrolment after onset of symptoms, median (Q1-Q3)</b>   | 5(3-8)                                        | 6(2-10)                                        | 8(5-10)                                       | 0.0001 <sup>b</sup> |
| <b>Charlson comorbidity index, median (Q1-Q3)</b>                  | 2(0-3)                                        | 3(1-4)                                         | 2(1-4)                                        | 0.0001 <sup>c</sup> |
| <b>N° (%) of subjects with underlying chronic disease</b>          |                                               |                                                |                                               |                     |
| - With hypertension                                                | 108(37.8)                                     | 263(44.3)                                      | 239(47.2)                                     | 0.35 <sup>a</sup>   |
| - With cardio-vascular disease                                     | 49(17.1)                                      | 167(28.1)                                      | 120(23.7)                                     | 0.002 <sup>a</sup>  |
| - With diabetes                                                    | 39(13.6)                                      | 125(21)                                        | 90(17.8)                                      | 0.027 <sup>a</sup>  |
| - With malignancy                                                  | 17(5.9)                                       | 42(7.1)                                        | 27(5.3)                                       | 0.483 <sup>a</sup>  |
| - With chronic kidney disease                                      | 19(6.6)                                       | 64(10.8)                                       | 22(4.4)                                       | 0.0001 <sup>a</sup> |
| - With chronic obstructive pulmonary disease                       | 37(12.9)                                      | 50(8.4)                                        | 37(7.3)                                       | 0.024 <sup>a</sup>  |
| - With hepatopathy                                                 | 5(1.8)                                        | 20(3.4)                                        | 25(5)                                         | 0.059 <sup>a</sup>  |
| <b>N° (%) of asymptomatic subjects</b>                             | 28(10.4)                                      | 120(20)                                        | 53(10.5)                                      | 0.0001 <sup>a</sup> |
| <b>N° (%) of symptomatic patients</b>                              | 240(89.6)                                     | 479(80)                                        | 454(89.5)                                     |                     |
| <b>N° (%) of symptomatic subjects with</b>                         |                                               |                                                |                                               |                     |
| - fever                                                            | 189(68.7)                                     | 325(54.8)                                      | 305(60.4)                                     | 0.0001 <sup>a</sup> |
| - cough                                                            | 109(39.5)                                     | 193(32.6)                                      | 161(32)                                       | 0.078 <sup>a</sup>  |
| - dyspnea                                                          | 103(37.1)                                     | 317(53.5)                                      | 356(70.6)                                     | 0.0001 <sup>a</sup> |
| - hypo ageusia                                                     | 46(21.5)                                      | 27(4.6)                                        | 15(3)                                         | 0.0001 <sup>a</sup> |
| - hypo-anosmia                                                     | 42(19.3)                                      | 29(4.9)                                        | 10(2.0)                                       | 0.0001 <sup>a</sup> |
| - diarrhea                                                         | 19(8.1)                                       | 30(5.1)                                        | 22(4.4)                                       | 0.100 <sup>a</sup>  |
| - cutaneous lesions                                                | 3(1.7)                                        | 2(0.3)                                         | 3(0.6)                                        | 0.138 <sup>a</sup>  |
| <b>Length of hospitalization expressed in days, median (Q1-Q3)</b> | 17(13-25)                                     | 13(8.5-20)                                     | 14(9.5-19)                                    | 0.0001 <sup>c</sup> |

a, Chi-square test; b, non-way ANOVA; c, Kruskal-Wallis test.

**Table S2.** Demographic, Clinical and Laboratory data of patients with severe outcome grouped by period of hospitalization.

|                                                             | severe<br>COVID 19<br>First wave | severe<br>COVID 19<br>Second wave | severe<br>COVID 19<br>Third wave | P value            |
|-------------------------------------------------------------|----------------------------------|-----------------------------------|----------------------------------|--------------------|
| N° of subjects                                              | 105                              | 318                               | 199                              |                    |
| N° (%) of males                                             | 74(70.5)                         | 199(62.6)                         | 120(60.3)                        | 0.206 <sup>a</sup> |
| Age, years, median (Q1-Q3)                                  | 73(58-80)                        | 68(57-80)                         | 70(58-81)                        | 0.602 <sup>b</sup> |
| Days of enrolment after onset of symptoms, Median (Q1-Q3)   | 6(3-9.5)                         | 6(2-9)                            | 6.5(3-10)                        | 0.760 <sup>b</sup> |
| Charlson comorbidity index, median (Q1-Q3)                  | 3(1-5)                           | 4(2-5)                            | 3(1-5)                           | 0.070 <sup>c</sup> |
| N° (%) of subjects with underlying chronic disease          |                                  |                                   |                                  |                    |
| - With hypertension                                         | 55(53.9)                         | 157(49.8)                         | 113(56.8)                        | 0.297 <sup>a</sup> |
| - With cardio-vascular disease                              | 40(39.2)                         | 114(36.2)                         | 71(35.7)                         | 0.821 <sup>a</sup> |
| - With diabetes                                             | 24(23.5)                         | 87(27.6)                          | 41(20.6)                         | 0.190 <sup>a</sup> |
| - With malignancy                                           | 19(18.6)                         | 26(8.3)                           | 12(6)                            | 0.001 <sup>a</sup> |
| - With chronic kidney disease                               | 13(12.7)                         | 36(11.5)                          | 19(9.5)                          | 0.667 <sup>a</sup> |
| - With chronic obstructive pulmonary disease                | 19(18.6)                         | 48(15.2)                          | 19(9.5)                          | 0.064 <sup>a</sup> |
| - With hepatopathy                                          | 3(2.9)                           | 11(3.5)                           | 4(2.0)                           | 0.616 <sup>a</sup> |
| N° (%) of asymptomatic subjects                             | 3(3)                             | 29(9.1)                           | 6(3.0)                           | 0.007 <sup>a</sup> |
| N° (%) of symptomatic patients                              | 97(97)                           | 289(90.9)                         | 193(97)                          |                    |
| N° (%) of symptomatic subjects with                         |                                  |                                   |                                  |                    |
| - fever                                                     | 48(78.7)                         | 186(58.7)                         | 117(59.1)                        | 0.011 <sup>a</sup> |
| - cough                                                     | 32(52.5)                         | 114(36.2)                         | 72(36.4)                         | 0.048 <sup>a</sup> |
| - dyspnea                                                   | 37(61.7)                         | 241(75.8)                         | 178(89.9)                        | 0.000 <sup>a</sup> |
| - hypo ageusia                                              | 4(11.1)                          | 10(3.2)                           | 6(3.0)                           | 0.046 <sup>a</sup> |
| - hypo-anosmia                                              | 1(2.8)                           | 8(2.5)                            | 2(1)                             | 0.459 <sup>a</sup> |
| - diarrhea                                                  | 5(11.1)                          | 11(3.5)                           | 3(1.5)                           | 0.006 <sup>a</sup> |
| - cutaneous lesions                                         | 0(0)                             | 1(0.3)                            | 1(0.5)                           | 0.894 <sup>a</sup> |
| Length of hospitalization expressed in days, median (Q1-Q3) | 18(10-28)                        | 16(10-24)                         | 14(8-20)                         | 0.006 <sup>c</sup> |
| Number of patients who died during hospitalization, N°(%)   | 65(61.9)                         | 104(32.7)                         | 46(23.1)                         | 0.000 <sup>a</sup> |

a, Chi- square test; b, non-way ANOVA; c, Kruskal-Wallis test.
